# Supplementary material for: Association between facility-level adherence to phosphorus management guidelines and mortality in haemodialysis patients: a prospective cohort study
Source: HighWire-hosted journal article supplement (doi:10.1136/bmjopen-2021-051002), 2021-09-01
Supplement: bmjopen-2021-051002supp001_data_supplement.pdf [file bmjopen-2021-051002supp001_data_supplement.pdf]

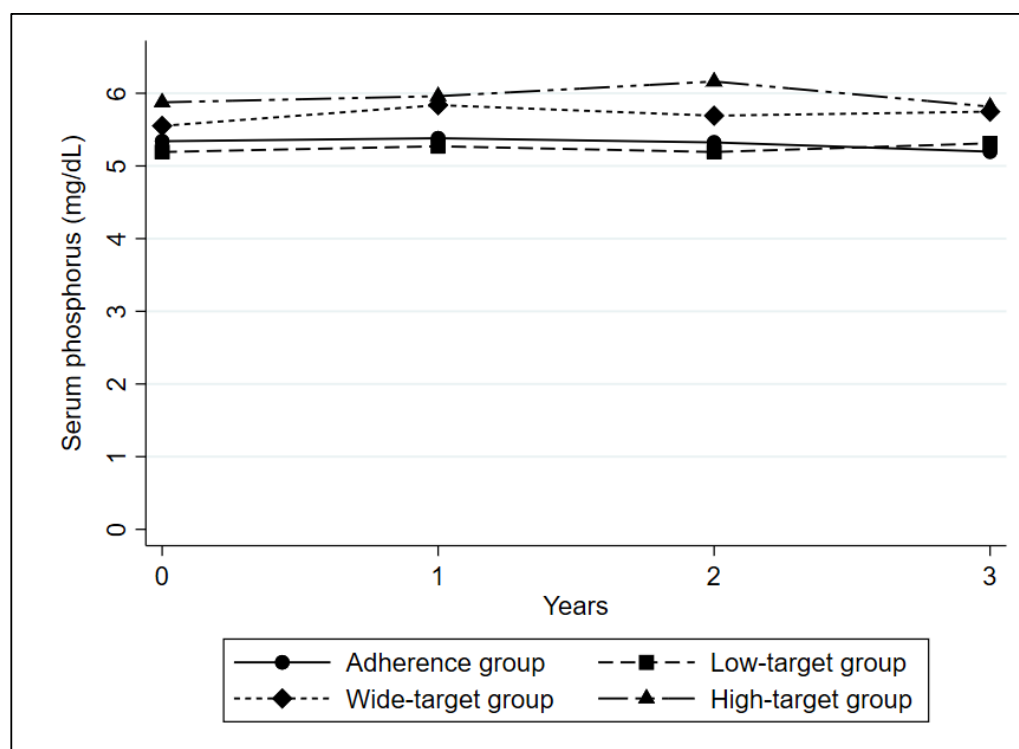

**Supplementary Figure S1. Change of serum phosphorus concentration by exposure groups throughout the study.**

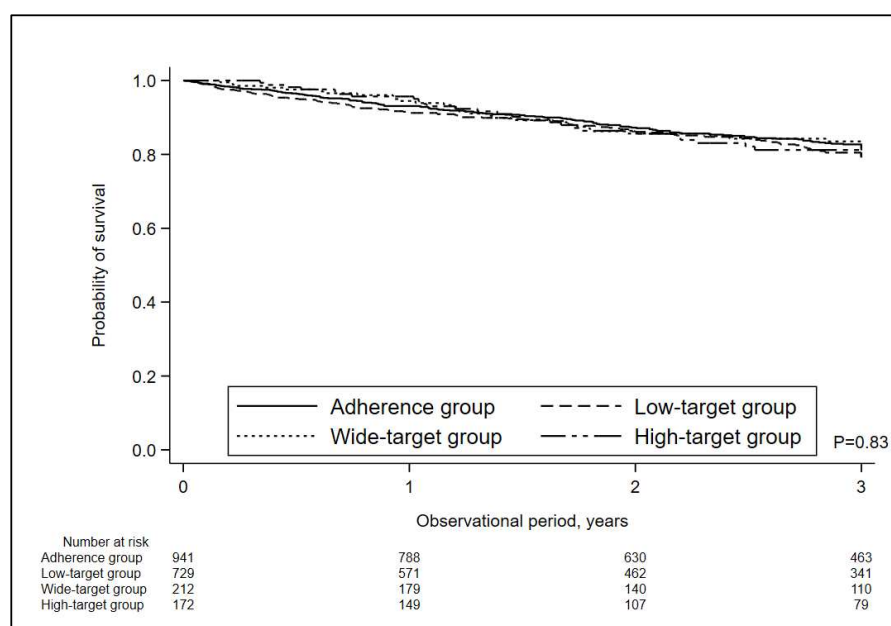

**Supplementary Figure S2. Event-free survival rate for all-cause mortality.**

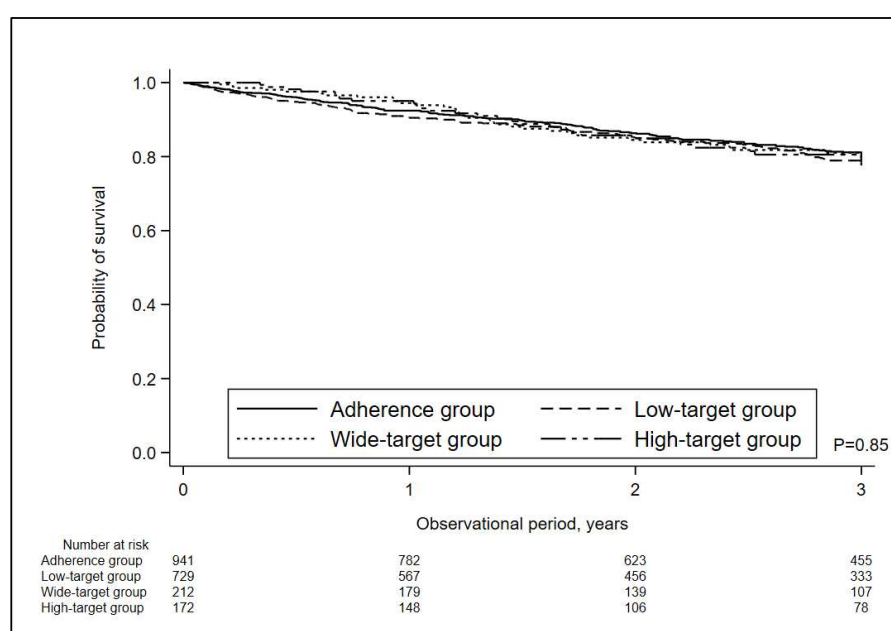

**Supplementary Figure S3. Event-free survival rate for MACEs.** MACEs included acute myocardial infarction, stroke, and all-cause mortality. MACEs, major adverse cardiovascular events.

**Supplementary Table S1. Association between facility-level target ranges of phosphorous and all-cause mortality.**

|                         | Unadjusted HR | 95% CI         | P-value | Adjusted HR | 95% CI         | P-value |
|-------------------------|---------------|----------------|---------|-------------|----------------|---------|
| Facility-level target   |               |                |         |             |                |         |
| Adherence group         | 1.00          | Reference      |         | 1.00        | Reference      |         |
| Low-target group        | 1.12          | (0.88 to 1.42) | 0.36    | 1.04        | (0.76 to 1.43) | 0.79    |
| Wide-target group       | 1.07          | (0.74 to 1.55) | 0.71    | 1.11        | (0.68 to 1.81) | 0.68    |
| High-target group       | 1.09          | (0.72 to 1.63) | 0.69    | 1.95        | (1.12 to 3.38) | 0.018   |
| Age                     |               |                |         | 1.06        | (1.04 to 1.07) | < 0.001 |
| Men                     |               |                |         | 1.46        | (1.14 to 1.86) | 0.003   |
| Dialysis vintage        |               |                |         | 1.02        | (1.01 to 1.04) | 0.005   |
| Serum albumin           |               |                |         | 0.58        | (0.51 to 0.67) | < 0.001 |
| Serum phosphorus        |               |                |         | 0.82        | (0.65 to 1.02) | 0.63    |
| Corrected serum calcium |               |                |         | 0.95        | (0.76 to 1.18) | 0.073   |
| Diabetes mellitus       |               |                |         | 1.55        | (1.21 to 1.97) | < 0.001 |
| Liver disease           |               |                |         | 1.09        | (0.77 to 1.54) | 0.62    |
| Hypertension            |               |                |         | 0.85        | (0.63 to 1.13) | 0.25    |
| Heart disease           |               |                |         | 1.23        | (0.97 to 1.56) | 0.091   |
| Stroke or TIA           |               |                |         | 1.16        | (0.86 to 1.58) | 0.33    |
| Cancer                  |               |                |         | 1.35        | (1.01 to 1.82) | 0.046   |

Adherence group, lower limit of serum phosphorus value (LL)  $\geq 3.5$  mg/dL and upper limit of serum phosphorus value (UL)  $\leq 6.0$  mg/dL; Low-target group, LL  $< 3.5$  mg/dL and UL  $\leq 6.0$  mg/dL; Wide-target group, LL  $< 3.5$  mg/dL and UL  $> 6.0$  mg/dL; High-target group, LL  $\geq 3.5$  mg/dL and UL  $> 6.0$  mg/dL. Heart disease included coronary heart disease, coronary artery disease, angina, myocardial infarction, bypass surgery, and coronary angioplasty. HR, hazard ratio; CI, confidence interval; TIA, transient ischemic attack.

**Supplementary Table S2. Association between facility-level target ranges of phosphorous and MACEs**

|                         | Unadjusted HR | 95% CI         | P-value | Adjusted HR | 95% CI         | P-value |
|-------------------------|---------------|----------------|---------|-------------|----------------|---------|
| Facility-level target   |               |                |         |             |                |         |
| Adherence group         | 1.00          | Reference      |         | 1.00        | Reference      |         |
| Low-target group        | 1.11          | (0.88 to 1.40) | 0.38    | 1.06        | (0.79 to 1.42) | 0.71    |
| Wide-target group       | 1.08          | (0.76 to 1.54) | 0.68    | 1.15        | (0.73 to 1.81) | 0.56    |
| High-target group       | 1.04          | (0.70 to 1.54) | 0.86    | 1.85        | (1.10 to 3.11) | 0.020   |
| Age                     |               |                |         | 1.05        | (1.04 to 1.06) | < 0.001 |
| Men                     |               |                |         | 1.50        | (1.18 to 1.90) | 0.001   |
| Dialysis vintage        |               |                |         | 1.02        | (1.01 to 1.04) | 0.005   |
| Serum albumin           |               |                |         | 0.59        | (0.52 to 0.67) | < 0.001 |
| Serum phosphorus        |               |                |         | 0.83        | (0.67 to 1.03) | 0.093   |
| Corrected serum calcium |               |                |         | 0.93        | (0.76 to 1.14) | 0.48    |
| Diabetes mellitus       |               |                |         | 1.52        | (1.20 to 1.92) | < 0.001 |
| Liver disease           |               |                |         | 1.05        | (0.75 to 1.47) | 0.76    |
| Hypertension            |               |                |         | 0.89        | (0.68 to 1.18) | 0.42    |
| Heart disease           |               |                |         | 1.24        | (0.98 to 1.56) | 0.071   |
| Stroke or TIA           |               |                |         | 1.14        | (0.85 to 1.54) | 0.38    |
| Cancer                  |               |                |         | 1.30        | (0.97 to 1.74) | 0.075   |

Adherence group, lower limit of serum phosphorus value (LL)  $\geq 3.5$  mg/dL and upper limit of serum phosphorus value (UL)  $\leq 6.0$  mg/dL; Low-target group, LL  $< 3.5$  mg/dL and UL  $\leq 6.0$  mg/dL; Wide-target group, LL  $< 3.5$  mg/dL and UL  $> 6.0$  mg/dL; High-target group, LL  $\geq 3.5$  mg/dL and UL  $> 6.0$  mg/dL. Heart disease included coronary heart disease, coronary artery disease, angina, myocardial infarction, bypass surgery, and coronary angioplasty. MACEs included acute myocardial infarction, stroke, and all-cause mortality. MACEs, major adverse cardiovascular events. HR, hazard ratio; CI, confidence interval; TIA, transient ischemic attack.
